# Supplementary material for: Duplication and parallel evolution of the pancreatic ribonuclease gene (RNASE1) in folivorous non-colobine primates, the howler monkeys (Alouatta spp.)
Source: PubMed Central journal article supplement (PMC6937293; doi:10.1038/s41598-019-56941-7), 2019-12-30
Supplement: 41598_2019_56941_MOESM1_ESM.pdf [file 41598_2019_56941_MOESM1_ESM.pdf]

Duplication and parallel evolution of the pancreatic ribonuclease gene (*RNASE1*) in folivorous non-colobine primates, the howler monkeys (*Alouatta* spp.)

Mareike C. Janiak, Andrew S. Burrell, Joseph D. Orkin, Todd R. Disotell

**Supplemental Table S1.** NCBI accession numbers for sequences used in this study.

| Gene                       | Species                     | NCBI Accession Number/Location   |
|----------------------------|-----------------------------|----------------------------------|
| <i>RNASE1</i>              | <i>Aotus nancymaeae</i>     | NW_012163535.1 [8186684-8187154] |
|                            | <i>Ateles geoffroyi</i>     | AF449639.1                       |
|                            | <i>Callithrix jacchus</i>   | NC_013905.1 [45071412-45071882]  |
|                            | <i>Cebus capucinus</i>      | NW_016107398.1 [302123-302593]   |
|                            | <i>Chlorocebus aethiops</i> | AF449635.1                       |
|                            | <i>Colobus guereza</i>      | DQ516063.1                       |
|                            | <i>Gorilla gorilla</i>      | AF449629.1                       |
|                            | <i>Homo sapiens</i>         | NC_000014.9 [20801598-20802069]  |
|                            | <i>Lagothrix lagotricha</i> | AF449640.1                       |
|                            | <i>Lemur catta</i>          | AF449641.1                       |
|                            | <i>Macaca mulatta</i>       | AF449632.1                       |
|                            | <i>Macaca nemestrina</i>    | AF449633.1                       |
|                            | <i>Miopithecus talapoin</i> | AF449636.1                       |
|                            | <i>Nasalis larvatus</i>     | DQ494879.1                       |
|                            | <i>Nomascus leucogenys</i>  | AF449631.1                       |
|                            | <i>Pan troglodytes</i>      | AF449628.1                       |
|                            | <i>Papio hamadryas</i>      | AF449634.1                       |
|                            | <i>Pongo pygmaeus</i>       | DQ494868.1                       |
|                            | <i>Procolobus badius</i>    | DQ494875.1                       |
|                            | <i>Pygathrix nemaeus</i>    | AF449642.1                       |
|                            | <i>Rhinopithecus bieti</i>  | GQ334693.1                       |
|                            | <i>Saguinus oedipus</i>     | AF449638.1                       |
|                            | <i>Saimiri sciureus</i>     | AF449637.1                       |
|                            | <i>Tarsius syrichta</i>     | NW_007023513.1 [17837-18307]     |
|                            | <i>Bos taurus</i>           | NC_037337.1 [26356008-26357591]  |
|                            | <i>Alouatta palliata</i>    | PRJNA593273                      |
|                            | <i>Alouatta seniculus</i>   | PRJNA593273                      |
|                            | <i>Alouatta sara</i>        | PRJNA593273                      |
|                            | <i>Alouatta pigra</i>       | PRJNA593273                      |
|                            | <i>RNASE1B</i>              | <i>Colobus guereza</i>           |
| <i>Nasalis larvatus</i>    |                             | DQ494863.1                       |
| <i>Pygathrix nemaeus</i>   |                             | AF449643.1                       |
| <i>Procolobus badius</i>   |                             | DQ494873.1                       |
| <i>Rhinopithecus bieti</i> |                             | GQ334696.1                       |
| <i>Alouatta palliata</i>   |                             | PRJNA593273                      |
| <i>Alouatta seniculus</i>  |                             | PRJNA593273                      |
| <i>Alouatta sara</i>       |                             | PRJNA593273                      |
| <i>RNASE1C</i>             | <i>Colobus guereza</i>      | DQ516065.1                       |
|                            | <i>Procolobus badius</i>    | DQ494874.1                       |
| <i>LYZ</i>                 | <i>Alouatta palliata</i>    | supplemental alignment           |
|                            | <i>Callithrix jacchus</i>   | U76923.1                         |
|                            | <i>Colobus guereza</i>      | U76916.1                         |
|                            | <i>Nasalis larvatus</i>     | AH004928.2                       |
|                            | <i>Papio anubis</i>         | U76919.1                         |
|                            | <i>Saguinus oedipus</i>     | U76922.1                         |
| <i>LYZ2</i>                | <i>Saimiri boliviensis</i>  | NW_003943629.1 [1119538-1124395] |
|                            | <i>Bos taurus</i>           | NM_180999.1                      |

**Supplemental Table S2.** Primers used for *RNASE1* amplification.

| Primer            | Sequence             | Settings                                                                                      |
|-------------------|----------------------|-----------------------------------------------------------------------------------------------|
| RNASE1_Alouatta_F | TCCTCCACAGAAGCATCGAA | 3 min at 98°C; 30 cycles of 20 sec at 98°C, 30 sec at 55°C, and 30 sec at 72°C; 5 min at 72°C |
| RNASE1_Alouatta_R | AGGTGGTCTCAGGTGATTCT |                                                                                               |

**Supplemental Table S3.** Pairwise identity (%) of lysozyme C (LYZ) amino acid sequences

|                                          | <i>Bos taurus</i><br>LYZ2C | <i>Colobus</i><br><i>guereza</i> LYZ | <i>Nasalis</i><br><i>larvatus</i> LYZ | <i>Papio</i><br><i>anubis</i> LYZ | <i>Alouatta</i><br><i>palliata</i> LYZ | <i>Callithrix</i><br><i>jacchus</i> LYZ | <i>Saguinus</i><br><i>oedipus</i> LYZ |
|------------------------------------------|----------------------------|--------------------------------------|---------------------------------------|-----------------------------------|----------------------------------------|-----------------------------------------|---------------------------------------|
| <i>Colobus guereza</i><br>LYZ            | 75.00                      |                                      |                                       |                                   |                                        |                                         |                                       |
| <i>Nasalis larvatus</i><br>LYZ           | 75.00                      | 95.95                                |                                       |                                   |                                        |                                         |                                       |
| <i>Papio anubis</i><br>LYZ               | 68.92                      | 91.22                                | 91.22                                 |                                   |                                        |                                         |                                       |
| <i>Alouatta palliata</i><br>LYZ          | 68.92                      | 84.46                                | 83.78                                 | 86.49                             |                                        |                                         |                                       |
| <i>Callithrix jacchus</i><br>LYZ         | 68.92                      | 86.49                                | 84.46                                 | 89.86                             | 91.89                                  |                                         |                                       |
| <i>Saguinus oedipus</i><br>LYZ           | 68.24                      | 85.81                                | 83.78                                 | 89.19                             | 91.22                                  | 97.97                                   |                                       |
| <i>Saimiri</i><br><i>boliviensis</i> LYZ | 68.92                      | 86.49                                | 84.46                                 | 89.86                             | 91.22                                  | 97.97                                   | 97.30                                 |

**Supplemental Table S4.** Variant calls for reads mapped against species-specific *RNASE1* consensus sequence. Bolded positions are common to all species.

| Species                                | Position                                     | Reference allele     | Alternative allele(s) | Percentage of reads |        |
|----------------------------------------|----------------------------------------------|----------------------|-----------------------|---------------------|--------|
|                                        |                                              |                      |                       | Ref                 | Alt    |
| <i>Alouatta palliata</i> (10X)         | 709                                          | A                    | G                     | 76.92               | 17.95  |
|                                        | 715                                          | C                    | T                     | 37.84               | 59.46  |
|                                        | 736                                          | CCTGGTGCTGCTGGTGCTGG | CCTGGTGCTGG           | 45.45               | 48.48  |
|                                        | <b>789-790</b>                               | AG                   | GA                    | 57.45               | 38.30  |
|                                        | 793                                          | C                    | T                     | 71.74               | 28.26  |
|                                        | <b>794</b>                                   | G                    | A                     | 57.45               | 42.55  |
|                                        | 830                                          | T                    | G                     | 70.21               | 29.79  |
|                                        | <b>835</b>                                   | TAGCAGCA             | TAGCAGCAGCA           | 58.14               | 41.86  |
|                                        | 845                                          | C                    | T                     | 53.33               | 46.67  |
|                                        | <b>847</b>                                   | T                    | C                     | 52.17               | 47.83  |
|                                        | 859                                          | C                    | T                     | 80.39               | 19.61  |
|                                        | 862                                          | C                    | T                     | 71.15               | 28.85  |
|                                        | <b>893</b>                                   | C                    | T                     | 57.89               | 42.11  |
|                                        | 949                                          | C                    | T                     | 69.49               | 30.51  |
|                                        | 986                                          | T                    | G                     | 39.62               | 58.49  |
|                                        | 1027                                         | C                    | A                     | 82.69               | 17.31  |
|                                        | <i>Alouatta palliata</i><br>(MiSeq, Apal_S1) | 709                  | A                     | G                   | 74.64  |
| 715                                    |                                              | C                    | T                     | 49.13               | 49.12  |
| 736                                    |                                              | CCTGGTGCTGCTGGTGCTGG | CCTGGTGCTGG           | 40.99               | 33.74  |
| <b>789-790</b>                         |                                              | GA                   | AG                    | 50.56               | 43.16  |
| <b>793-794</b>                         |                                              | CA                   | TG, CG                | 53.74               | 21, 25 |
| 830                                    |                                              | T                    | G                     | 77.62               | 21.63  |
| <b>835</b>                             |                                              | TAGCAGCA             | TAGCAGCAGCA           | 56.14               | 29.03  |
| 845                                    |                                              | C                    | T                     | 62.18               | 37.17  |
| <b>847</b>                             |                                              | T                    | C                     | 56.00               | 41.91  |
| 859                                    |                                              | C                    | T                     | 74.87               | 23.19  |
| 862                                    |                                              | C                    | T                     | 75.79               | 22.34  |
| 893                                    |                                              | C                    | T                     | 50.21               | 47.93  |
| 919                                    |                                              | G                    | A                     | 74.40               | 24.30  |
| 949                                    |                                              | C                    | T                     | 74.90               | 24.36  |
| 986                                    |                                              | T                    | G                     | 51.29               | 47.72  |
| 1027                                   |                                              | C                    | A                     | 74.07               | 25.23  |
| 1129                                   |                                              | T                    | C                     | 72.62               | 26.51  |
| <i>Alouatta seniculus</i><br>(Asen_S2) | <b>789-790</b>                               | AG                   | GA                    | 54.36               | 38.84  |
|                                        | <b>794</b>                                   | G                    | A                     | 54.54               | 43.32  |
|                                        | <b>835</b>                                   | TAGCAGCA             | TAGCAGCAGCA           | 56.93               | 30.26  |
|                                        | <b>847</b>                                   | T                    | C                     | 60.62               | 38.59  |

|                                    |                |          |             |       |       |
|------------------------------------|----------------|----------|-------------|-------|-------|
|                                    | 860            | A        | G           | 54.90 | 43.31 |
|                                    | <b>893</b>     | C        | T           | 51.55 | 47.50 |
|                                    | 986            | G        | A, T        | 49.09 | 48.76 |
|                                    | 1041           | G        | A           | 50.91 | 23.70 |
|                                    | 1111           | C        | A           | 74.24 | 23.82 |
| <i>Alouatta sara</i><br>(Bhow_S3)  | 709            | G        | A           | 50.06 | 49.37 |
|                                    | 711            | C        | T           | 53.70 | 44.97 |
|                                    | 716            | G        | A           | 78.10 | 21.40 |
|                                    | 743            | C        | T           | 54.06 | 40.68 |
|                                    | <b>789-790</b> | GA       | AG          | 75.29 | 22.95 |
|                                    | <b>794</b>     | A        | G           | 49.43 | 43.14 |
|                                    | <b>835</b>     | TAGCAGCA | TAGCAGCAGCA | 54.13 | 43.70 |
|                                    | 845            | C        | T           | 56.72 | 29.73 |
|                                    | <b>847</b>     | T        | C           | 62.51 | 36.82 |
|                                    | 860            | A        | G           | 55.87 | 42.15 |
|                                    | <b>893</b>     | C        | T           | 53.18 | 45.99 |
|                                    | 1041           | G        | A           | 50.60 | 47.64 |
|                                    | 1111           | C        | A           | 72.77 | 25.35 |
| <i>Alouatta pigra</i><br>(Ghow_S4) | 709            | G        | A           | 46.39 | 52.97 |
|                                    | 716            | G        | A           | 65.85 | 32.77 |
|                                    | <b>789-790</b> | GA       | AG          | 65.91 | 28.89 |
|                                    | <b>794</b>     | A        | G           | 39.01 | 55.14 |
|                                    | 830            | T        | G           | 42.07 | 55.87 |
|                                    | <b>835</b>     | TAGCAGCA | TAGCAGCAGCA | 43.67 | 55.61 |
|                                    | 845            | C        | T           | 46.89 | 41.30 |
|                                    | <b>847</b>     | T        | C           | 47.42 | 51.69 |
|                                    | <b>893</b>     | C        | T           | 40.35 | 57.98 |
|                                    | 902            | C        | T           | 37.26 | 60.84 |
|                                    | 1027           | C        | A           | 39.35 | 58.62 |
|                                    | 1032           | G        | A           | 38.57 | 60.96 |
|                                    | 1041           | A        | G           | 69.99 | 26.73 |
|                                    | 1071           | G        | A           | 40.49 | 57.85 |
|                                    | 1084           | G        | A           | 36.81 | 62.27 |

**Supplemental Table S5.** Pairwise identities (%) of *Alouatta RNASE1* haplotype nucleotide sequences.

|                      | Ghow_ Hap3 | Ghow_ Hap2 | Bhow_ Hap_1 | Asen_H ap3 | Asen_H ap1 | Apal_H ap_1 | Apal10 X_Hap2 | Apal_H ap3 | Apal10 X_Hap3 | Ghow_ Hap1 | Bhow_ Hap_3 | Bhow_ Hap_2 | Asen_H ap2 | Apal_H ap_2 |
|----------------------|------------|------------|-------------|------------|------------|-------------|---------------|------------|---------------|------------|-------------|-------------|------------|-------------|
| <b>Ghow_ Hap3</b>    |            |            |             |            |            |             |               |            |               |            |             |             |            |             |
| <b>Ghow_ Hap2</b>    | 99.57      |            |             |            |            |             |               |            |               |            |             |             |            |             |
| <b>Bhow_ Hap1</b>    | 98.28      | 98.71      |             |            |            |             |               |            |               |            |             |             |            |             |
| <b>Asen_H ap3</b>    | 98.28      | 98.71      | 100         |            |            |             |               |            |               |            |             |             |            |             |
| <b>Asen_H ap1</b>    | 98.28      | 98.28      | 99.57       | 99.57      |            |             |               |            |               |            |             |             |            |             |
| <b>Apal_H ap_1</b>   | 98.06      | 98.06      | 98.49       | 98.49      | 98.49      |             |               |            |               |            |             |             |            |             |
| <b>Apal10 X_Hap2</b> | 98.06      | 98.06      | 98.92       | 98.92      | 98.92      | 99.14       |               |            |               |            |             |             |            |             |
| <b>Apal_H ap3</b>    | 98.06      | 98.06      | 98.92       | 98.92      | 98.92      | 98.28       | 99.14         |            |               |            |             |             |            |             |
| <b>Apal10 X_Hap3</b> | 98.06      | 98.06      | 98.92       | 98.92      | 98.92      | 98.28       | 99.14         | 100        |               |            |             |             |            |             |
| <b>Ghow_ Hap1</b>    | 96.34      | 96.34      | 96.77       | 96.77      | 96.77      | 96.55       | 96.98         | 96.98      | 96.98         |            |             |             |            |             |
| <b>Bhow_ Hap_3</b>   | 96.12      | 96.12      | 96.98       | 96.98      | 96.98      | 96.34       | 96.77         | 97.2       | 97.2          | 99.35      |             |             |            |             |
| <b>Bhow_ Hap_2</b>   | 95.47      | 95.91      | 96.77       | 96.77      | 96.34      | 95.69       | 96.12         | 96.55      | 96.55         | 98.7       | 99.35       |             |            |             |
| <b>Asen_H ap2</b>    | 96.12      | 96.55      | 97.41       | 97.41      | 97.2       | 96.34       | 96.77         | 96.77      | 96.77         | 98.48      | 99.13       | 98.92       |            |             |
| <b>Apal_H ap_2</b>   | 93.53      | 93.53      | 94.4        | 94.4       | 94.61      | 94.18       | 95.04         | 95.04      | 95.04         | 96.75      | 96.53       | 96.1        | 96.53      |             |
| <b>Apal10 X_Hap1</b> | 93.53      | 93.53      | 94.4        | 94.4       | 94.61      | 94.18       | 95.04         | 95.04      | 95.04         | 96.75      | 96.53       | 96.1        | 96.53      | 100         |

**Supplemental Table S6.** Isoelectric point ( $pI$ ) for all primate *RNASE1* sequences and duplicated sequences, including reconstructed ancestral sequences.  $pI$  calculated with ExPASy.

| Sequence                     | $pI$ |
|------------------------------|------|
| LEMUR_CATTA_RNASE1           | 8.82 |
| SAGUINUS_OEDIPUS_RNASE1      | 8.82 |
| CALLITHRIX_JACCHUS_RNASE1    | 9.10 |
| N7                           | 8.65 |
| AOTUS_NANCYMAAE_RNASE1       | 7.56 |
| N6                           | 8.43 |
| SAIMIRI_SCIUREUS_RNASE1      | 8.65 |
| CEBUS_CAPUCINUS_RNASE1       | 8.81 |
| N8                           | 8.81 |
| N5                           | 8.81 |
| APAL_HAP2                    | 8.43 |
| GHOW_HAP1                    | 8.12 |
| N12                          | 8.43 |
| BHOW_HAP2                    | 8.64 |
| ASEN_HAP2                    | 8.64 |
| N13                          | 8.64 |
| N11                          | 8.43 |
| APAL_HAP1                    | 6.50 |
| GHOW_HAP2                    | 5.81 |
| ASEN_HAP1                    | 6.49 |
| BHOW_HAP1                    | 6.49 |
| N16                          | 6.49 |
| N15                          | 6.50 |
| N14                          | 6.50 |
| N10                          | 8.43 |
| ATELES_GEOFFROYI_RNASE1      | 8.43 |
| LAGOTHRIX_LAGOTRICHIA_RNASE1 | 8.12 |
| N17                          | 8.43 |
| N9                           | 8.43 |
| N4                           | 8.43 |
| PAPIO_HAMADRYAS_RNASE1       | 9.26 |
| MACACA_MULATTA_RNASE1        | 9.16 |
| MACACA_NEMESTRINA_RNASE1     | 9.15 |
| N22                          | 9.34 |
| N21                          | 9.34 |
| CHLOROCEBUS_AETHIOPS_RNASE1  | 9.26 |
| MIOPITHECUS_TALAPOIN_RNASE1  | 9.26 |
| N23                          | 9.34 |
| N20                          | 9.34 |
| RHINOPITHECUS_BIETI_RNASE1   | 9.22 |
| RHINOPITHECUS_BIETI_RNASE1B  | 8.43 |
| N27                          | 9.22 |

**Supplemental Tables and Figures**

|                            |      |
|----------------------------|------|
| PYGATHRIX_NEMAEUS_RNASE1   | 9.20 |
| PYGATHRIX_NEMAEUS_RNASE1B  | 6.93 |
| N28                        | 9.20 |
| N26                        | 9.22 |
| NASALIS_LARVATUS_RNASE1    | 9.22 |
| NASALIS_LARVATUS_RNASE1B   | 6.93 |
| N29                        | 9.22 |
| N25                        | 9.22 |
| PROCOLOBUS_BADIUS_RNASE1   | 9.24 |
| PROCOLOBUS_BADIUS_RNASE1B  | 6.40 |
| PROCOLOBUS_BADIUS_RNASE1C  | 6.04 |
| N32                        | 6.40 |
| N31                        | 9.24 |
| COLOBUS_GUEREZA_RNASE1     | 9.11 |
| COLOBUS_GUEREZA_RNASE1B    | 7.58 |
| COLOBUS_GUEREZA_RNASE1C    | 7.55 |
| N34                        | 8.43 |
| N33                        | 9.24 |
| N30                        | 9.24 |
| N24                        | 9.24 |
| N19                        | 9.11 |
| NOMASCUS_LEUCOGENYS_RNASE1 | 8.96 |
| GORILLA_GORILLA_RNASE1     | 8.96 |
| PAN_TROGLODYTES_RNASE1     | 9.10 |
| HOMO_SAPIENS_RNASE1        | 9.10 |
| N38                        | 8.96 |
| N37                        | 8.96 |
| PONGO_PYGMAEUS_RNASE1      | 9.10 |
| N36                        | 8.96 |
| N35                        | 8.96 |
| N18                        | 8.96 |
| N3                         | 8.65 |
| TARSIUS_SYRICHTA_RNASE1    | 8.66 |
| N2                         | 8.82 |
| N1                         | 8.82 |

**Supplemental Figure S7.** Results of *RNASE1* amplicon sequencing with an Illumina MiSeq Micro V2 cartridge. Number of reads generated for each sample and number of reads mapped to *RNASE1* reference. The percentage of reads that mapped is indicated above each bar.

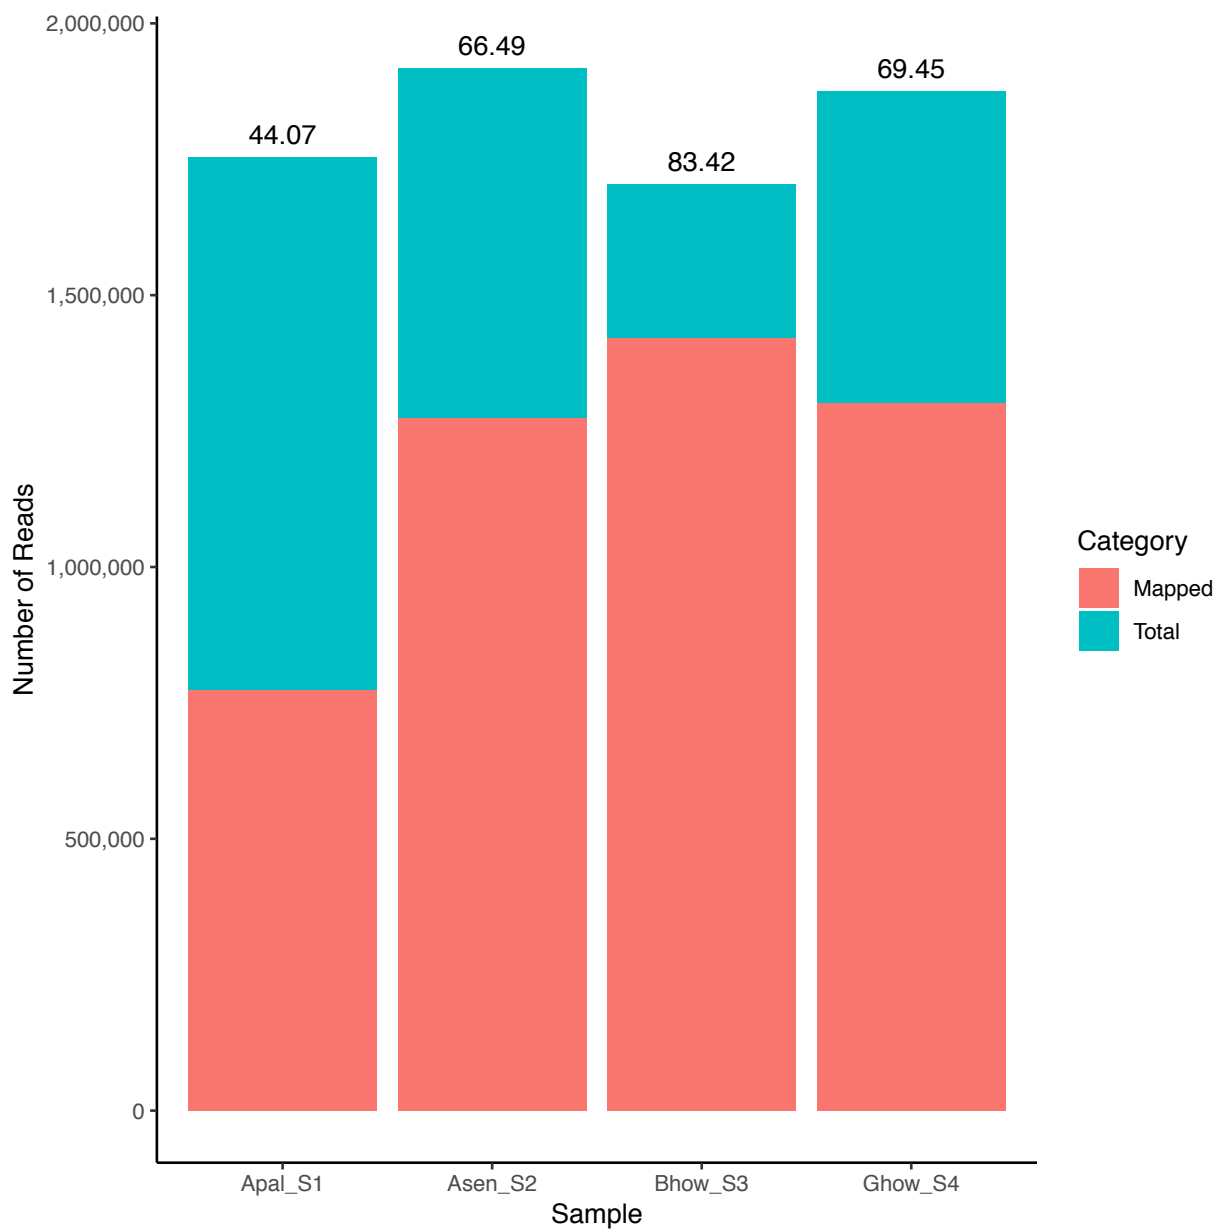





**References**

1. Jermann, T. M., Opitz, J. G., Stackhouse, J. & Benner, S. A. Reconstructing the evolutionary history of the artiodactyl ribonuclease superfamily. *Nature* **374**, 57–59 (1995)
2. Opitz, J. G. *et al.* Origin of the catalytic activity of bovine seminal ribonuclease against double-stranded RNA. *Biochemistry* **37**, 4023–4033 (1998)
3. Zhang, J., Zhang, Y.-P. & Rosenberg, H. F. Adaptive evolution of a duplicated pancreatic ribonuclease gene in a leaf-eating monkey. *Nat. Genet.* **30**, 411–415 (2002)
4. Zhang, J. Parallel Functional Changes in the Digestive RNases of Ruminants and Colobines by Divergent Amino Acid Substitutions. *Mol. Biol. Evol.* **20**, 1310–1317 (2003)
